# Supplementary material for: RNA-Seq Reveals Infection-Related Gene Expression Changes in Phytophthora capsici
Source: PLoS One. 2013 Sep 3;8(9):e74588. doi: 10.1371/journal.pone.0074588 (PMC3760852; doi:10.1371/journal.pone.0074588)
Supplement: Material S4 — The effector genes differentially expressed during the pre-infection stages of Phytophthora capsici. (7 different categories listed in separate sheets with annotation). (XLS) [file pone.0074588.s007.xls]

## Sheet: RxLR effectors
Material S4. The effector genes differentially expressed during the pre-infection stages of Phytophthora capsici (7 different categories listed in separate sheets with annotation).
Gene ID	MY	ZO	GC	COG_class	COG_class_annotation	GO_annotation	KEGG_annotation	Swissprot_annotation	TrEMBL_annotation	NR_annotation	NT_annotation
jgi|Phyca11|21452|fgenesh1_pg.PHYCAscaffold_96_#_5	0	0	21	--	--	--	--	--	Secreted RxLR effector peptide protein, putative GN=PITG_09216 OS=Phytophthora infestans (strain T30-4) PE=4 SV=1	gi|301108862|ref|XP_002903512.1| secreted RxLR effector peptide protein, putative [Phytophthora infestans T30-4]	--
jgi|Phyca11|572048|estExt2_Genewise1.C_PHYCAscaffold_460147	1	3	116	--	--	--	--	--	Avh196 GN=Avh OS=Phytophthora sojae (Soybean stem and root rot agent) PE=4 SV=1	gi|301103067|ref|XP_002900620.1| secreted RxLR effector peptide protein, putative [Phytophthora infestans T30-4]	--
jgi|Phyca11|536383|estExt2_fgenesh1_pg.C_PHYCAscaffold_520031	24	114	2	--	--	--	--	--	Secreted RxLR effector peptide protein, putative GN=PITG_15556 OS=Phytophthora infestans (strain T30-4) PE=4 SV=1	gi|301097230|ref|XP_002897710.1| secreted RxLR effector peptide protein, putative [Phytophthora infestans T30-4]	--
jgi|Phyca11|124376|e_gw1.53.334.1	3	30	32	--	--	--	--	--	Secreted RxLR effector peptide protein, putative GN=PITG_06094 OS=Phytophthora infestans (strain T30-4) PE=4 SV=1	gi|301113027|ref|XP_002998284.1| secreted RxLR effector peptide protein, putative [Phytophthora infestans T30-4]	--
jgi|Phyca11|132610|e_gw1.190.5.1	25	96	76	--	--	--	--	--	Secreted RxLR effector peptide protein, putative (Fragment) GN=PITG_22683 OS=Phytophthora infestans (strain T30-4) PE=4 SV=1	gi|301120794|ref|XP_002908124.1| secreted RxLR effector peptide protein, putative [Phytophthora infestans T30-4]	--
jgi|Phyca11|20942|fgenesh1_pg.PHYCAscaffold_77_#_10	0	9	112	--	--	--	--	--	Secreted RxLR effector peptide protein, putative GN=PITG_15255 OS=Phytophthora infestans (strain T30-4) PE=4 SV=1	--	--
jgi|Phyca11|129734|e_gw1.86.150.1	0	0	14	--	--	--	--	--	Secreted RxLR effector peptide protein, putative GN=PITG_15235 OS=Phytophthora infestans (strain T30-4) PE=4 SV=1	gi|301099183|ref|XP_002898683.1| secreted RxLR effector peptide protein, putative [Phytophthora infestans T30-4]	--
jgi|Phyca11|17159|fgenesh1_pg.PHYCAscaffold_25_#_62	32	82	0	--	--	--	--	--	Avr2 family secreted RxLR effector peptide protein, putative GN=PITG_19617 OS=Phytophthora infestans (strain T30-4) PE=4 SV=1	gi|301092155|ref|XP_002996938.1| avr2 family secreted RxLR effector peptide protein, putative [Phytophthora infestans T30-4]	--
jgi|Phyca11|115890|e_gw1.29.161.1	0	0	15	--	--	--	--	--	Secreted RxLR effector peptide protein, putative (Fragment) GN=PITG_02918 OS=Phytophthora infestans (strain T30-4) PE=4 SV=1	gi|301120099|ref|XP_002907777.1| secreted RxLR effector peptide protein, putative [Phytophthora infestans T30-4]	--
jgi|Phyca11|538616|estExt2_Genewise1Plus.C_PHYCAscaffold_20101	0	7	15	--	--	--	--	--	Secreted RxLR effector peptide protein, putative (Fragment) GN=PITG_13847 OS=Phytophthora infestans (strain T30-4) PE=4 SV=1	gi|301100876|ref|XP_002899527.1| secreted RxLR effector peptide protein, putative [Phytophthora infestans T30-4]	--
jgi|Phyca11|75839|gw1.5.621.1	0	1	106	--	--	--	--	--	Secreted RxLR effector peptide protein, putative GN=PITG_19302 OS=Phytophthora infestans (strain T30-4) PE=4 SV=1	gi|301092479|ref|XP_002997095.1| secreted RxLR effector peptide protein, putative [Phytophthora infestans T30-4]	--
jgi|Phyca11|107349|e_gw1.13.824.1	3	1	70	--	--	--	--	--	Secreted RxLR effector peptide protein, putative GN=PITG_17063 OS=Phytophthora infestans (strain T30-4) PE=4 SV=1	gi|301096329|ref|XP_002897262.1| secreted RxLR effector peptide protein, putative [Phytophthora infestans T30-4]	--
jgi|Phyca11|548556|estExt2_Genewise1Plus.C_PHYCAscaffold_290165	0	6	63	--	--	--	--	--	Secreted RxLR effector peptide protein, putative GN=PITG_02900 OS=Phytophthora infestans (strain T30-4) PE=4 SV=1	gi|301120071|ref|XP_002907763.1| secreted RxLR effector peptide protein, putative [Phytophthora infestans T30-4]	--
jgi|Phyca11|130681|e_gw1.96.102.1	0	0	56	--	--	--	--	--	Secreted RxLR effector peptide protein, putative GN=PITG_09218 OS=Phytophthora infestans (strain T30-4) PE=4 SV=1	gi|301108864|ref|XP_002903513.1| secreted RxLR effector peptide protein, putative [Phytophthora infestans T30-4]	--
jgi|Phyca11|98344|e_gw1.2.1024.1	79	394	16	--	--	--	--	--	Secreted RxLR effector peptide protein, putative GN=PITG_04339 OS=Phytophthora infestans (strain T30-4) PE=4 SV=1	gi|301116501|ref|XP_002905979.1| secreted RxLR effector peptide protein, putative [Phytophthora infestans T30-4]	--
jgi|Phyca11|12109|fgenesh1_pm.PHYCAscaffold_96_#_6	0	1	67	--	--	--	--	--	Secreted RxLR effector peptide protein, putative (Fragment) GN=PITG_09224 OS=Phytophthora infestans (strain T30-4) PE=4 SV=1	gi|301108874|ref|XP_002903518.1| secreted RxLR effector peptide protein, putative [Phytophthora infestans T30-4]	--
jgi|Phyca11|22122|fgenesh1_pg.PHYCAscaffold_863_#_1	52	1296	131	--	--	--	--	--	Putative uncharacterized protein (Fragment) GN=PHYSODRAFT_538278 OS=Phytophthora sojae (strain P6497) PE=4 SV=1	gi|301116117|ref|XP_002905787.1| secreted RxLR effector peptide protein, putative [Phytophthora infestans T30-4]	--
jgi|Phyca11|538116|estExt2_Genewise1Plus.C_PHYCAscaffold_10381	0	0	19	--	--	--	--	--	Putative uncharacterized protein GN=PHYSODRAFT_285719 OS=Phytophthora sojae (strain P6497) PE=4 SV=1	gi|301110929|ref|XP_002904544.1| secreted RxLR effector peptide protein, putative [Phytophthora infestans T30-4]	--
jgi|Phyca11|18364|fgenesh1_pg.PHYCAscaffold_36_#_4	0	17	21	--	--	--	--	--	Secreted RxLR effector peptide protein, putative (Fragment) GN=PITG_04282 OS=Phytophthora infestans (strain T30-4) PE=4 SV=1	gi|301116417|ref|XP_002905937.1| secreted RxLR effector peptide protein, putative [Phytophthora infestans T30-4]	--
jgi|Phyca11|19678|fgenesh1_pg.PHYCAscaffold_50_#_100	4	9	66	--	--	--	--	--	Avirulence protein 1b GN=Avh1b-35 OS=Phytophthora sojae (strain P6497) PE=4 SV=1	--	--
jgi|Phyca11|21868|fgenesh1_pg.PHYCAscaffold_170_#_3	0	1	20	--	--	--	--	sp|P10667|MUA1_XENLA Integumentary mucin A.1 OS=Xenopus laevis PE=1 SV=1	Avr1b-1 avirulence-like protein GN=Avh1b76 OS=Phytophthora sojae (strain P6497) PE=4 SV=1	gi|301110955|ref|XP_002904557.1| conserved hypothetical protein [Phytophthora infestans T30-4]	Phytophthora infestans T30-4 conserved hypothetical protein (PITG_07573) mRNA, complete cds
jgi|Phyca11|133691|e_gw1.645.4.1	0	0	19	--	--	--	--	--	Avr1b-1 avirulence-like protein GN=Avh1b76 OS=Phytophthora sojae (strain P6497) PE=4 SV=1	gi|301091233|ref|XP_002895806.1| conserved hypothetical protein [Phytophthora infestans T30-4]	Phytophthora infestans T30-4 conserved hypothetical protein (PITG_07576) mRNA, complete cds
jgi|Phyca11|535497|estExt2_fgenesh1_pg.C_PHYCAscaffold_370037	10	63	27	--	--	--	--	--	Secreted RxLR effector peptide protein, putative (Fragment) GN=PITG_00707 OS=Phytophthora infestans (strain T30-4) PE=4 SV=1	gi|301123109|ref|XP_002909281.1| secreted RxLR effector peptide protein, putative [Phytophthora infestans T30-4]	--
jgi|Phyca11|509817|fgenesh2_kg.PHYCAscaffold_50_#_18_#_4099440:1	7	20	1	--	--	--	--	--	Putative uncharacterized protein GN=PHYSODRAFT_355041 OS=Phytophthora sojae (strain P6497) PE=4 SV=1	gi|301112999|ref|XP_002998270.1| avr2 family secreted RxLR effector peptide protein, putative [Phytophthora infestans T30-4]	--
jgi|Phyca11|22053|fgenesh1_pg.PHYCAscaffold_535_#_1	5	14	95	--	--	--	--	--	Avirulence protein 1b GN=Avh1b-35 OS=Phytophthora sojae (strain P6497) PE=4 SV=1	--	--
jgi|Phyca11|15653|fgenesh1_pg.PHYCAscaffold_14_#_156	0	0	10	--	--	--	--	--	Secreted RxLR effector peptide protein, putative (Fragment) GN=PITG_10835 OS=Phytophthora infestans (strain T30-4) PE=4 SV=1	gi|301105140|ref|XP_002901654.1| secreted RxLR effector peptide protein, putative [Phytophthora infestans T30-4]	--
jgi|Phyca11|114125|e_gw1.25.511.1	0	1	13	--	--	--	--	--	AVR3a4 OS=Phytophthora capsici PE=1 SV=1	gi|167047080|gb|ABZ10808.1| Avh1 [Phytophthora capsici]	Phytophthora capsici Avh1 gene, complete cds
jgi|Phyca11|8132|fgenesh1_pm.PHYCAscaffold_25_#_64	0	0	10	--	--	--	--	--	Avh1 OS=Phytophthora capsici PE=4 SV=1	gi|167047080|gb|ABZ10808.1| Avh1 [Phytophthora capsici]	Phytophthora capsici Avh1 gene, complete cds
jgi|Phyca11|129120|e_gw1.81.53.1	0	0	7	--	--	--	--	--	Putative uncharacterized protein GN=PHYSODRAFT_333395 OS=Phytophthora sojae (strain P6497) PE=4 SV=1	gi|301113474|ref|XP_002998507.1| secreted RxLR effector peptide protein, putative [Phytophthora infestans T30-4]	--
jgi|Phyca11|97196|e_gw1.1.556.1	0	0	7	--	--	--	--	--	Secreted RxLR effector peptide protein, putative GN=PITG_07558 OS=Phytophthora infestans (strain T30-4) PE=4 SV=1	gi|301110929|ref|XP_002904544.1| secreted RxLR effector peptide protein, putative [Phytophthora infestans T30-4]	--
jgi|Phyca11|124413|e_gw1.53.390.1	1	2	11	--	--	--	--	--	Secreted RxLR effector peptide protein, putative GN=PITG_06087 OS=Phytophthora infestans (strain T30-4) PE=4 SV=1	gi|301113013|ref|XP_002998277.1| secreted RxLR effector peptide protein, putative [Phytophthora infestans T30-4]	--
jgi|Phyca11|511325|fgenesh2_kg.PHYCAscaffold_81_#_2_#_4099690:1	0	0	7	--	--	--	--	--	Avh143 GN=Avh OS=Phytophthora sojae (Soybean stem and root rot agent) PE=4 SV=1	gi|301098432|ref|XP_002898309.1| secreted RxLR effector peptide protein, putative [Phytophthora infestans T30-4]	--

## Sheet: CRN
Gene ID	MY	ZO	GC	COG_class	COG_class_annotation	GO_annotation	KEGG_annotation	Swissprot_annotation	TrEMBL_annotation	NR_annotation	NT_annotation
jgi|Phyca11|575544|estExt2_Genewise1.C_PHYCAscaffold_750066	61	129	37	--	--	--	--	--	Putative uncharacterized protein GN=PHYSODRAFT_348355 OS=Phytophthora sojae (strain P6497) PE=4 SV=1	gi|301101231|ref|XP_002899704.1| crinkler (CRN) domain-containing protein [Phytophthora infestans T30-4]	Phytophthora infestans T30-4 Crinkler (CRN) family protein (PITG_17199) mRNA, complete cds
jgi|Phyca11|576078|estExt2_Genewise1.C_PHYCAscaffold_830005	49	87	20	--	--	Molecular Function: transferase activity, transferring phosphorus-containing groups (GO:0016772);;	--	--	Crinkler (CRN) family protein (Fragment) GN=PITG_22968 OS=Phytophthora infestans (strain T30-4) PE=4 SV=1	gi|301100597|ref|XP_002899388.1| Crinkler (CRN) family protein [Phytophthora infestans T30-4]	Phytophthora capsici clone CBOT101-G15 mRNA sequence
jgi|Phyca11|506739|fgenesh2_kg.PHYCAscaffold_21_#_111_#_Contig665.1	58	150	38	--	--	--	--	sp|O94317|YH5D_SCHPO Uncharacterized serine-rich protein C215.13 OS=Schizosaccharomyces pombe GN=SPBC215.13 PE=1 SV=1	Crinkler (CRN) family protein GN=PITG_22848 OS=Phytophthora infestans (strain T30-4) PE=4 SV=1	gi|301109187|ref|XP_002903674.1| Crinkler (CRN) family protein [Phytophthora infestans T30-4]	Phytophthora capsici clone CBOT109-K10 mRNA sequence
jgi|Phyca11|118577|e_gw1.36.571.1	175	307	103	--	--	--	--	--	Crinkler (CRN) family protein, putative GN=PITG_00154 OS=Phytophthora infestans (strain T30-4) PE=4 SV=1	gi|301122109|ref|XP_002908781.1| crinkler (CRN) family protein, putative [Phytophthora infestans T30-4]	--
jgi|Phyca11|504851|fgenesh2_kg.PHYCAscaffold_10_#_11_#_4098753:1	45	81	19	--	--	--	--	--	Putative uncharacterized protein (Fragment) GN=PHYSODRAFT_533153 OS=Phytophthora sojae (strain P6497) PE=4 SV=1	gi|301097061|ref|XP_002897626.1| Crinkler (CRN) family protein [Phytophthora infestans T30-4]	Phytophthora capsici clone CBOT101-G15 mRNA sequence
jgi|Phyca11|575550|estExt2_Genewise1.C_PHYCAscaffold_750112	71	100	28	--	--	--	--	--	Crinkler (CRN) family protein GN=PITG_16221 OS=Phytophthora infestans (strain T30-4) PE=4 SV=1	gi|301097061|ref|XP_002897626.1| Crinkler (CRN) family protein [Phytophthora infestans T30-4]	Phytophthora infestans T30-4 Crinkler (CRN) family protein (PITG_17185) mRNA, complete cds
jgi|Phyca11|20879|fgenesh1_pg.PHYCAscaffold_75_#_8	173	294	72	--	--	--	--	--	Putative uncharacterized protein GN=PHYSODRAFT_287175 OS=Phytophthora sojae (strain P6497) PE=4 SV=1	gi|301091227|ref|XP_002895803.1| Crinkler (CRN) family protein [Phytophthora infestans T30-4]	Phytophthora infestans T30-4 crinkler (CRN) family protein, putative (PITG_22956) mRNA, complete cds
jgi|Phyca11|128403|e_gw1.75.131.1	23	61	11	--	--	--	--	--	Putative uncharacterized protein GN=PHYSODRAFT_287175 OS=Phytophthora sojae (strain P6497) PE=4 SV=1	gi|301093633|ref|XP_002997662.1| Crinkler (CRN) family protein [Phytophthora infestans T30-4]	Phytophthora sojae CRN115 protein (CRN115) mRNA, complete cds
jgi|Phyca11|511383|fgenesh2_kg.PHYCAscaffold_83_#_11_#_Contig1471.1	56	112	26	--	--	--	--	--	Putative uncharacterized protein (Fragment) GN=PHYSODRAFT_533137 OS=Phytophthora sojae (strain P6497) PE=4 SV=1	gi|301117484|ref|XP_002906470.1| crinkler (CRN) family protein, putative [Phytophthora infestans T30-4]	--
jgi|Phyca11|511381|fgenesh2_kg.PHYCAscaffold_83_#_9_#_Contig727.1	128	183	51	--	--	--	--	--	Crinkler (CRN) family protein GN=PITG_18503 OS=Phytophthora infestans (strain T30-4) PE=4 SV=1	gi|301093551|ref|XP_002997621.1| Crinkler (CRN) family protein [Phytophthora infestans T30-4]	Phytophthora infestans clone PC007D12 CRN-like CRN11 mRNA, complete cds
jgi|Phyca11|34764|gw1.83.9.1	12	38	5	--	--	--	--	--	Crinkler (CRN) family protein GN=PITG_12009 OS=Phytophthora infestans (strain T30-4) PE=4 SV=1	gi|301104749|ref|XP_002901459.1| Crinkler (CRN) family protein [Phytophthora infestans T30-4]	Phytophthora infestans T30-4 Crinkler (CRN) family protein (PITG_12009) mRNA, complete cds
jgi|Phyca11|108895|e_gw1.16.149.1	3	24	3	--	--	--	--	--	Crinkler (CRN) family protein GN=PITG_18547 OS=Phytophthora infestans (strain T30-4) PE=4 SV=1	gi|301093625|ref|XP_002997658.1| Crinkler (CRN) family protein [Phytophthora infestans T30-4]	Phytophthora infestans T30-4 Crinkler (CRN) family protein (PITG_17185) mRNA, complete cds
jgi|Phyca11|570403|estExt2_Genewise1.C_PHYCAscaffold_370147	36	32	8	--	--	--	--	--	Putative uncharacterized protein GN=PHYSODRAFT_478630 OS=Phytophthora sojae (strain P6497) PE=4 SV=1	gi|301093633|ref|XP_002997662.1| Crinkler (CRN) family protein [Phytophthora infestans T30-4]	Phytophthora capsici clone CBOT77-G12 mRNA sequence

## Sheet: elicitin
Gene ID	MY	ZO	GC	COG_class	COG_class_annotation	GO_annotation	KEGG_annotation	Swissprot_annotation	TrEMBL_annotation	NR_annotation	NT_annotation
jgi|Phyca11|566444|estExt2_Genewise1.C_PHYCAscaffold_210143	30	293	304	--	--	--	--	sp|Q4L9P0|SRAP_STAHJ Serine-rich adhesin for platelets OS=Staphylococcus haemolyticus (strain JCSC1435) GN=sraP PE=3 SV=1	Putative GP-anchored serine-rich elicitin INL13-like protein GN=PITG_20413 OS=Phytophthora infestans (strain T30-4) PE=4 SV=1	gi|301090894|ref|XP_002895644.1| putative GP-anchored serine-rich elicitin INL13-like protein [Phytophthora infestans T30-4]	Phytophthora sojae elicitin-like protein SOL13J gene, complete cds
jgi|Phyca11|537868|estExt2_fgenesh1_pg.C_PHYCAscaffold_5640001	2	45	24	--	--	--	--	sp|O10341|Y091_NPVOP Uncharacterized 29.3 kDa protein OS=Orgyia pseudotsugata multicapsid polyhedrosis virus GN=ORF92 PE=4 SV=1	Putative elicitin protein RAM6 OS=Phytophthora ramorum (Sudden oak death agent) PE=4 SV=1	gi|150866581|ref|XP_001386230.2| hypothetical protein PICST_68241 [Scheffersomyces stipitis CBS 6054]	Phytophthora ramorum strain 3211 locus 83987 genomic sequence
jgi|Phyca11|559294|estExt2_Genewise1.C_PHYCAscaffold_30272	4	54	13	--	--	Cellular Component: extracellular region (GO:0005576);; Biological Process: defense response (GO:0006952);; Biological Process: pathogenesis (GO:0009405);;	--	--	Elicitin-like protein INL6 (Fragment) OS=Phytophthora infestans (Potato late blight fungus) PE=2 SV=1	gi|81159337|gb|ABB55941.1| elicitin-like protein INL6 [Phytophthora infestans]	Phytophthora ramorum elicitin-like protein RAL6 gene, complete cds
jgi|Phyca11|18414|fgenesh1_pg.PHYCAscaffold_36_#_54	1	28	17	--	--	--	--	sp|P19275|VTP3_TTV1V Viral protein TPX OS=Thermoproteus tenax virus 1 (strain VT3) PE=4 SV=1	Putative elicitin protein RAM6 OS=Phytophthora ramorum (Sudden oak death agent) PE=4 SV=1	gi|150866581|ref|XP_001386230.2| hypothetical protein PICST_68241 [Scheffersomyces stipitis CBS 6054]	Phytophthora ramorum strain 3211 locus 83987 genomic sequence
jgi|Phyca11|61538|gw1.21.332.1	34	191	192	--	--	--	--	--	Elicitin-like protein RAL13F OS=Phytophthora ramorum (Sudden oak death agent) PE=4 SV=1	gi|81159365|gb|ABB55955.1| elicitin-like protein RAL13F [Phytophthora ramorum]	--
jgi|Phyca11|506674|fgenesh2_kg.PHYCAscaffold_21_#_46_#_4098978:1	36	193	78	--	--	Molecular Function: nucleotide binding (GO:0000166);; Molecular Function: nucleic acid binding (GO:0003676);;	--	sp|Q1HE01|NCBP2_BOMMO Nuclear cap-binding protein subunit 2 OS=Bombyx mori PE=2 SV=1	Elicitin-like protein GN=PITG_13114 OS=Phytophthora infestans (strain T30-4) PE=4 SV=1	gi|301103105|ref|XP_002900639.1| elicitin-like protein [Phytophthora infestans T30-4]	Phytophthora infestans T30-4 elicitin-like protein (PITG_13114) mRNA, complete cds
jgi|Phyca11|527634|estExt2_fgenesh1_pm.C_PHYCAscaffold_210040	111	306	40	--	--	--	--	--	Putative GPI-anchored serine rich elicitin SOL13E-like protein GN=PITG_20412 OS=Phytophthora infestans (strain T30-4) PE=4 SV=1	gi|301090892|ref|XP_002895643.1| putative GPI-anchored serine rich elicitin SOL13E-like protein [Phytophthora infestans T30-4]	Phytophthora sojae elicitin-like protein SOL13E gene, complete cds
jgi|Phyca11|116840|e_gw1.31.155.1	12	72	43	--	--	Cellular Component: extracellular region (GO:0005576);; Biological Process: defense response (GO:0006952);; Biological Process: pathogenesis (GO:0009405);;	--	sp|B3KS81|SRRM5_HUMAN Serine/arginine repetitive matrix protein 5 OS=Homo sapiens GN=SRRM5 PE=2 SV=3	Putative GPI-anchored elicitin INL11b-like protein GN=PITG_10772 OS=Phytophthora infestans (strain T30-4) PE=4 SV=1	gi|301105038|ref|XP_002901603.1| putative GPI-anchored elicitin INL11b-like protein [Phytophthora infestans T30-4]	Phytophthora sojae elicitin-like protein SOL11B gene, complete cds
jgi|Phyca11|16638|fgenesh1_pg.PHYCAscaffold_21_#_55	10	59	7	--	--	--	--	sp|Q80Z19|MUC2_MOUSE Mucin-2 (Fragments) OS=Mus musculus GN=Muc2 PE=1 SV=2	Elicitin-like protein SOL13A OS=Phytophthora sojae (Soybean stem and root rot agent) PE=4 SV=1	gi|81159474|gb|ABB56009.1| elicitin-like protein SOL13A [Phytophthora sojae]	Phytophthora sojae elicitin-like protein SOL13A gene, complete cds
jgi|Phyca11|503459|fgenesh2_kg.PHYCAscaffold_3_#_324_#_4100309:2	188	23	511	--	--	Cellular Component: extracellular region (GO:0005576);; Biological Process: defense response (GO:0006952);; Biological Process: pathogenesis (GO:0009405);;	--	sp|Q3KSS4|EBNA1_EBVG Epstein-Barr nuclear antigen 1 OS=Epstein-Barr virus (strain GD1) GN=EBNA1 PE=1 SV=1	Elicitin-like protein SOL1A OS=Phytophthora sojae (Soybean stem and root rot agent) PE=4 SV=1	gi|81159493|gb|ABB56018.1| elicitin-like protein SOL1A [Phytophthora sojae]	Phytophthora sojae elicitin-like protein SOL1A gene, complete cds
jgi|Phyca11|570597|estExt2_Genewise1.C_PHYCAscaffold_380054	118	27	3	--	--	Cellular Component: extracellular region (GO:0005576);; Biological Process: defense response (GO:0006952);; Biological Process: pathogenesis (GO:0009405);;	--	sp|P41804|ELIA3_PHYCR Highly acidic elicitin 26 OS=Phytophthora cryptogea GN=B26 PE=3 SV=1	Putative elicitin protein SOJ3A OS=Phytophthora sojae (Soybean stem and root rot agent) PE=4 SV=1	gi|81159447|gb|ABB55996.1| putative elicitin protein SOJ3A [Phytophthora sojae]	Phytophthora sojae putative elicitin protein SOJ3A gene, complete cds
jgi|Phyca11|16626|fgenesh1_pg.PHYCAscaffold_21_#_43	0	10	610	--	--	--	--	sp|Q09624|LOV1_CAEEL Location of vulva defective 1 OS=Caenorhabditis elegans GN=lov-1 PE=1 SV=3	Elicitin-like protein RAL13F OS=Phytophthora ramorum (Sudden oak death agent) PE=4 SV=1	gi|81159365|gb|ABB55955.1| elicitin-like protein RAL13F [Phytophthora ramorum]	--
jgi|Phyca11|508770|fgenesh2_kg.PHYCAscaffold_38_#_22_#_4098798:1	1601	2562	10	--	--	Cellular Component: extracellular region (GO:0005576);; Biological Process: defense response (GO:0006952);; Biological Process: pathogenesis (GO:0009405);;	--	sp|P41802|ELIA1_PHYCR Acidic elicitin A1 OS=Phytophthora cryptogea GN=B14 PE=3 SV=1	Elicitin OS=Phytophthora capsici PE=4 SV=1	gi|37783440|gb|AAP43023.1| elicitin [Phytophthora capsici]	Phytophthora capsici elicitin mRNA, complete cds
jgi|Phyca11|527649|estExt2_fgenesh1_pm.C_PHYCAscaffold_210059	4	8	47	--	--	--	--	sp|P28968|GP2_EHV1B Glycoprotein gp2 OS=Equine herpesvirus 1 (strain Ab4p) GN=EUs4 PE=4 SV=1	Elicitin-like protein SOL13G OS=Phytophthora sojae (Soybean stem and root rot agent) PE=4 SV=1	gi|81159485|gb|ABB56014.1| elicitin-like protein SOL13G [Phytophthora sojae]	Phytophthora sojae elicitin-like protein SOL13G gene, complete cds
jgi|Phyca11|61617|gw1.68.148.1	0	0	66	--	--	--	--	--	Elicitin-like protein INL3B OS=Phytophthora infestans (Potato late blight fungus) PE=2 SV=1	gi|301113466|ref|XP_002998503.1| elicitin-like protein INL3B [Phytophthora infestans T30-4]	--
jgi|Phyca11|508766|fgenesh2_kg.PHYCAscaffold_38_#_18_#_4098798:1	976	1676	4	--	--	Cellular Component: extracellular region (GO:0005576);; Biological Process: defense response (GO:0006952);; Biological Process: pathogenesis (GO:0009405);;	--	sp|P41802|ELIA1_PHYCR Acidic elicitin A1 OS=Phytophthora cryptogea GN=B14 PE=3 SV=1	Elicitin OS=Phytophthora capsici PE=4 SV=1	gi|37783440|gb|AAP43023.1| elicitin [Phytophthora capsici]	Phytophthora capsici elicitin mRNA, complete cds
jgi|Phyca11|510832|fgenesh2_kg.PHYCAscaffold_68_#_8_#_Contig3581.1	2	4	1260	--	--	--	--	sp|A2QBQ3|EGLX_ASPNC Probable endo-1,3(4)-beta-glucanase An02g00850 OS=Aspergillus niger (strain CBS 513.88 / FGSC A1513) GN=An02g00850 PE=3 SV=1	Putative GPI-anchored serine-glycine rich elicitin INL3a-like protein GN=PITG_06370 OS=Phytophthora infestans (strain T30-4) PE=4 SV=1	gi|301113464|ref|XP_002998502.1| putative GPI-anchored serine-glycine rich elicitin INL3a-like protein [Phytophthora infestans T30-4]	Phytophthora infestans T30-4 putative GPI-anchored serine-glycine rich elicitin INL3a-like protein (PITG_06370) mRNA, complete cds
jgi|Phyca11|127329|e_gw1.68.153.1	0	1	99	--	--	--	--	sp|P41804|ELIA3_PHYCR Highly acidic elicitin 26 OS=Phytophthora cryptogea GN=B26 PE=3 SV=1	Elicitin-like protein INL3C OS=Phytophthora infestans (Potato late blight fungus) PE=2 SV=1	gi|301113470|ref|XP_002998505.1| putative GPI-anchored serine-rich elicitin INL3b-like protein [Phytophthora infestans T30-4]	--
jgi|Phyca11|508761|fgenesh2_kg.PHYCAscaffold_38_#_13_#_4099864:1	244	272	12	--	--	Cellular Component: extracellular region (GO:0005576);; Biological Process: defense response (GO:0006952);; Biological Process: pathogenesis (GO:0009405);;	--	sp|P15570|ELIB_PHYCR Beta-elicitin cryptogein OS=Phytophthora cryptogea PE=1 SV=2	Putative elicitin protein RAM2C OS=Phytophthora ramorum (Sudden oak death agent) PE=4 SV=1	gi|81159411|gb|ABB55978.1| putative elicitin protein RAM2A [Phytophthora ramorum]	Phytophthora sojae elicitin protein (SOJ2) mRNA, complete cds
jgi|Phyca11|551410|estExt2_Genewise1Plus.C_PHYCAscaffold_420061	6	39	237	--	--	Cellular Component: extracellular region (GO:0005576);; Biological Process: defense response (GO:0006952);; Biological Process: pathogenesis (GO:0009405);;	--	--	Elicitin-like protein GN=PITG_19604 OS=Phytophthora infestans (strain T30-4) PE=4 SV=1	gi|301092133|ref|XP_002996927.1| elicitin-like protein [Phytophthora infestans T30-4]	Phytophthora infestans T30-4 elicitin-like protein (PITG_19604) mRNA, complete cds
jgi|Phyca11|559703|estExt2_Genewise1.C_PHYCAscaffold_31039	21	36	106	--	--	--	--	sp|P41804|ELIA3_PHYCR Highly acidic elicitin 26 OS=Phytophthora cryptogea GN=B26 PE=3 SV=1	Elicitin-like protein RAL1B OS=Phytophthora ramorum (Sudden oak death agent) PE=4 SV=1	gi|81159371|gb|ABB55958.1| elicitin-like protein RAL1B [Phytophthora ramorum]	Phytophthora sojae elicitin-like protein SOL1D pseudogene, complete sequence
jgi|Phyca11|529073|estExt2_fgenesh1_pm.C_PHYCAscaffold_380012	1629	1178	107	--	--	Cellular Component: extracellular region (GO:0005576);; Biological Process: defense response (GO:0006952);; Biological Process: pathogenesis (GO:0009405);;	--	sp|P41803|ELIA2_PHYCR Highly acidic elicitin 20 OS=Phytophthora cryptogea GN=B20 PE=3 SV=1	Gamma-megaspermin (Precursor) GN=meg-gamma OS=Phytophthora megasperma (Potato pink rot fungus) PE=2 SV=1	gi|22091689|emb|CAD38503.1| gamma-megaspermin [Phytophthora megasperma]	Phytophthora ramorum putative elicitin protein RAM5 gene, complete cds
jgi|Phyca11|506685|fgenesh2_kg.PHYCAscaffold_21_#_57_#_4097975:1	2	7	20	--	--	--	--	sp|O94317|YH5D_SCHPO Uncharacterized serine-rich protein C215.13 OS=Schizosaccharomyces pombe GN=SPBC215.13 PE=1 SV=1	Elicitin-like protein GN=PITG_20414 OS=Phytophthora infestans (strain T30-4) PE=4 SV=1	gi|301090896|ref|XP_002895645.1| elicitin-like protein [Phytophthora infestans T30-4]	--
jgi|Phyca11|508763|fgenesh2_kg.PHYCAscaffold_38_#_15_#_4097477:1	1312	1600	6	--	--	Cellular Component: extracellular region (GO:0005576);; Biological Process: defense response (GO:0006952);; Biological Process: pathogenesis (GO:0009405);;	--	sp|P41803|ELIA2_PHYCR Highly acidic elicitin 20 OS=Phytophthora cryptogea GN=B20 PE=3 SV=1	Elicitin-like protein 6 (Precursor; Fragment) GN=ctp6 OS=Phytophthora citrophthora PE=2 SV=1	gi|111620693|gb|ABH11748.1| elicitin-like protein 6 precursor [Phytophthora citrophthora]	Phytophthora citrophthora strain BR381 elicitin-like protein 6 precursor (ctp6) mRNA, ctp6-2 allele, partial cds

## Sheet: transglutaminase elicitor-like
Gene ID	MY	ZO	GC	COG_class	COG_class_annotation	GO_annotation	KEGG_annotation	Swissprot_annotation	TrEMBL_annotation	NR_annotation	NT_annotation
jgi|Phyca11|505466|fgenesh2_kg.PHYCAscaffold_13_#_116_#_Contig111.1	86	30	467	--	--	Molecular Function: transferase activity (GO:0016740);;	--	sp|Q6PZE0|MUC19_MOUSE Mucin-19 OS=Mus musculus GN=Muc19 PE=2 SV=2	Transglutaminase elicitor, putative GN=PITG_16956 OS=Phytophthora infestans (strain T30-4) PE=4 SV=1	gi|301096163|ref|XP_002897179.1| transglutaminase elicitor, putative [Phytophthora infestans T30-4]	Phytophthora infestans T30-4 transglutaminase elicitor-like protein (PITG_22117) mRNA, complete cds
jgi|Phyca11|533401|estExt2_fgenesh1_pg.C_PHYCAscaffold_130108	12	1	48	--	--	Molecular Function: transferase activity, transferring acyl groups (GO:0016746);;	--	sp|Q4L9P0|SRAP_STAHJ Serine-rich adhesin for platelets OS=Staphylococcus haemolyticus (strain JCSC1435) GN=sraP PE=3 SV=1	Transglutaminase elicitor, putative GN=PITG_16953 OS=Phytophthora infestans (strain T30-4) PE=4 SV=1	gi|301096159|ref|XP_002897177.1| transglutaminase elicitor, putative [Phytophthora infestans T30-4]	Phytophthora capsici clone CBOT69-A12 mRNA sequence
jgi|Phyca11|561629|estExt2_Genewise1.C_PHYCAscaffold_70520	3	31	13	--	--	Cellular Component: plasma membrane (GO:0005886);; Biological Process: carbohydrate transport (GO:0008643);; Cellular Component: integral to membrane (GO:0016021);; Molecular Function: sugar transmembrane transporter activity (GO:0051119);; Biological Process: cellular response to organic substance (GO:0071310);;	--	sp|Q9FY94|SWT15_ARATH Bidirectional sugar transporter SWEET15 OS=Arabidopsis thaliana GN=SWEET15 PE=2 SV=1	MtN3-like protein GN=PITG_13499 OS=Phytophthora infestans (strain T30-4) PE=4 SV=1	gi|301101261|ref|XP_002899719.1| MtN3-like protein [Phytophthora infestans T30-4]	Phytophthora infestans elicitor-like transglutaminase M81B (M81B) and elicitor-like transglutaminase M81 (M81) genes, complete cds
jgi|Phyca11|544016|estExt2_Genewise1Plus.C_PHYCAscaffold_130455	20	5	326	--	--	Molecular Function: protein-glutamine gamma-glutamyltransferase activity (GO:0003810);;	--	sp|A8MUU9|YV023_HUMAN Putative uncharacterized protein ENSP00000383309 OS=Homo sapiens PE=5 SV=3	Transglutaminase elicitor M81D GN=PITG_16959 OS=Phytophthora infestans (strain T30-4) PE=4 SV=1	gi|301096167|ref|XP_002897181.1| transglutaminase elicitor M81D [Phytophthora infestans T30-4]	Phytophthora infestans transglutaminase elicitor M81D mRNA, complete cds
jgi|Phyca11|15434|fgenesh1_pg.PHYCAscaffold_13_#_122	0	0	9	--	--	Molecular Function: transferase activity, transferring acyl groups (GO:0016746);;	--	sp|P98088|MUC5A_HUMAN Mucin-5AC (Fragments) OS=Homo sapiens GN=MUC5AC PE=1 SV=3	Putative uncharacterized protein GN=PHYSODRAFT_256669 OS=Phytophthora sojae (strain P6497) PE=4 SV=1	gi|301096165|ref|XP_002897180.1| transglutaminase elicitor-like protein [Phytophthora infestans T30-4]	Phytophthora cinnamomi transglu gene for transglutaminase elicitor precursor
jgi|Phyca11|107078|e_gw1.13.190.1	0	0	12	--	--	Molecular Function: protein-glutamine gamma-glutamyltransferase activity (GO:0003810);;	--	sp|Q6S6W0|GP2_EHV1V Glycoprotein gp2 OS=Equine herpesvirus 1 (strain V592) GN=71 PE=3 SV=1	Transglutaminase elicitor-like protein GN=PITG_16958 OS=Phytophthora infestans (strain T30-4) PE=4 SV=1	gi|301096165|ref|XP_002897180.1| transglutaminase elicitor-like protein [Phytophthora infestans T30-4]	Phytophthora infestans T30-4 transglutaminase elicitor-like protein (PITG_16958) mRNA, complete cds
jgi|Phyca11|5713|fgenesh1_pm.PHYCAscaffold_7_#_79	2	9	21	--	--	Molecular Function: transferase activity (GO:0016740);;	--	--	Putative uncharacterized protein (Fragment) GN=PHYSODRAFT_566078 OS=Phytophthora sojae (strain P6497) PE=4 SV=1	gi|301101251|ref|XP_002899714.1| elicitor-like transglutaminase, putative [Phytophthora infestans T30-4]	Phytophthora infestans T30-4 elicitor-like transglutaminase, putative (PITG_13494) mRNA, complete cds

## Sheet: NLP
Gene ID	MY	ZO	GC	COG_class	COG_class_annotation	GO_annotation	KEGG_annotation	Swissprot_annotation	TrEMBL_annotation	NR_annotation	NT_annotation
jgi|Phyca11|109174|e_gw1.16.123.1	0	0	9	--	--	--	--	--	NPP1-like protein GN=PITG_23075 OS=Phytophthora infestans (strain T30-4) PE=4 SV=1	gi|301096876|ref|XP_002897534.1| NPP1-like protein [Phytophthora infestans T30-4]	Phytophthora infestans T30-4 NPP1-like protein (PITG_22709) mRNA, complete cds
jgi|Phyca11|9358|fgenesh1_pm.PHYCAscaffold_37_#_9	0	2	15	--	--	--	--	--	Putative uncharacterized protein (Fragment) GN=PHYSODRAFT_406265 OS=Phytophthora sojae (strain P6497) PE=4 SV=1	gi|301123207|ref|XP_002909330.1| NPP1-like protein [Phytophthora infestans T30-4]	Phytophthora infestans T30-4 NPP1-like protein (PITG_22668) mRNA, complete cds
jgi|Phyca11|69479|gw1.25.365.1	0	0	24	--	--	--	--	--	NPP1-like protein GN=PITG_08522 OS=Phytophthora infestans (strain T30-4) PE=4 SV=1	gi|301109625|ref|XP_002903893.1| NPP1-like protein [Phytophthora infestans T30-4]	Phytophthora infestans T30-4 NPP1-like protein (PITG_08522) mRNA, complete cds
jgi|Phyca11|507156|fgenesh2_kg.PHYCAscaffold_25_#_40_#_Contig1606.1	0	2	16	--	--	--	--	sp|P19275|VTP3_TTV1V Viral protein TPX OS=Thermoproteus tenax virus 1 (strain VT3) PE=4 SV=1	NPP1-like protein GN=PITG_08522 OS=Phytophthora infestans (strain T30-4) PE=4 SV=1	gi|301109625|ref|XP_002903893.1| NPP1-like protein [Phytophthora infestans T30-4]	Phytophthora infestans T30-4 NPP1-like protein (PITG_08522) mRNA, complete cds
jgi|Phyca11|69457|gw1.25.362.1	0	1	126	--	--	--	--	--	NPP1-like protein GN=PITG_08522 OS=Phytophthora infestans (strain T30-4) PE=4 SV=1	gi|301109625|ref|XP_002903893.1| NPP1-like protein [Phytophthora infestans T30-4]	Phytophthora infestans T30-4 NPP1-like protein (PITG_08522) mRNA, complete cds
jgi|Phyca11|118356|e_gw1.36.350.1	0	0	41	--	--	--	--	--	NPP1-like protein GN=PITG_04248 OS=Phytophthora infestans (strain T30-4) PE=4 SV=1	gi|301116361|ref|XP_002905909.1| NPP1-like protein [Phytophthora infestans T30-4]	Phytophthora infestans T30-4 NPP1-like protein (PITG_04200) mRNA, complete cds
jgi|Phyca11|118548|e_gw1.36.346.1	1	2	28	--	--	--	--	--	NPP1-like protein OS=Phytophthora infestans (Potato late blight fungus) PE=2 SV=1	gi|66270095|gb|AAY43377.1| NPP1-like protein [Phytophthora infestans]	Phytophthora infestans clone PA044C9 NPP1-like protein mRNA, complete cds
jgi|Phyca11|69477|gw1.25.363.1	0	0	21	--	--	--	--	--	NPP1-like protein GN=PITG_08522 OS=Phytophthora infestans (strain T30-4) PE=4 SV=1	gi|301109625|ref|XP_002903893.1| NPP1-like protein [Phytophthora infestans T30-4]	Phytophthora infestans T30-4 NPP1-like protein (PITG_08522) mRNA, complete cds

## Sheet: Enzyme inhibitors
Gene ID	MY	ZO	GC	COG_class	COG_class_annotation	GO_annotation	KEGG_annotation	Swissprot_annotation	TrEMBL_annotation	NR_annotation	NT_annotation
jgi|Phyca11|11087|fgenesh1_pm.PHYCAscaffold_61_#_34	1	26	48	--	--	Molecular Function: serine-type endopeptidase activity (GO:0004252);; Biological Process: proteolysis (GO:0006508);;	--	sp|P49275|DERF3_DERFA Mite allergen Der f 3 OS=Dermatophagoides farinae GN=DERF3 PE=1 SV=2	Glucanase inhibitor protein, putative GN=PITG_13655 OS=Phytophthora infestans (strain T30-4) PE=3 SV=1	gi|301101503|ref|XP_002899840.1| glucanase inhibitor protein, putative [Phytophthora infestans T30-4]	Phytophthora infestans T30-4 glucanase inhibitor protein, putative (PITG_13655) mRNA, complete cds
jgi|Phyca11|504748|fgenesh2_kg.PHYCAscaffold_9_#_139_#_4099167:1	131	538	245	--	--	Biological Process: proteolysis (GO:0006508);; Molecular Function: peptidase activity (GO:0008233);;	--	--	Protease inhibitor EpiC4 GN=PITG_00058 OS=Phytophthora infestans (strain T30-4) PE=4 SV=1	gi|301121931|ref|XP_002908692.1| protease inhibitor EpiC4 [Phytophthora infestans T30-4]	Phytophthora infestans T30-4 protease inhibitor EpiC4 (PITG_00058) mRNA, complete cds
jgi|Phyca11|511348|fgenesh2_kg.PHYCAscaffold_82_#_8_#_Contig3118.1	16	177	311	--	--	--	--	sp|P25304|AGRIN_RAT Agrin OS=Rattus norvegicus GN=Agrn PE=1 SV=2	Protease inhibitor Epi11 GN=PITG_07096 OS=Phytophthora infestans (strain T30-4) PE=4 SV=1	gi|301111962|ref|XP_002905060.1| protease inhibitor Epi11 [Phytophthora infestans T30-4]	Phytophthora infestans T30-4 protease inhibitor Epi11 (PITG_07096) mRNA, complete cds
jgi|Phyca11|101284|e_gw1.5.1192.1	10	5	59	--	--	Biological Process: proteolysis (GO:0006508);; Molecular Function: peptidase activity (GO:0008233);;	--	--	Protease inhibitor EpiC3 GN=PITG_14891 OS=Phytophthora infestans (strain T30-4) PE=4 SV=1	gi|301099965|ref|XP_002899073.1| protease inhibitor EpiC3 [Phytophthora infestans T30-4]	Phytophthora infestans T30-4 protease inhibitor EpiC3 (PITG_14891) mRNA, complete cds
jgi|Phyca11|511173|fgenesh2_kg.PHYCAscaffold_78_#_8_#_Contig2009.1	12	7	51	--	--	Biological Process: proteolysis (GO:0006508);; Biological Process: cell communication (GO:0007154);; Molecular Function: peptidase activity (GO:0008233);; Molecular Function: zinc ion binding (GO:0008270);; Molecular Function: phosphatidylinositol binding (GO:0035091);;	--	sp|Q9M0R7|ATL39_ARATH RING-H2 finger protein ATL39 OS=Arabidopsis thaliana GN=ATL39 PE=2 SV=1	Kazal serine protease inhibitor PbraEPI2 GN=PITG_16472 OS=Phytophthora infestans (strain T30-4) PE=4 SV=1	gi|301096818|ref|XP_002897505.1| kazal serine protease inhibitor PbraEPI2 [Phytophthora infestans T30-4]	Phytophthora infestans T30-4 kazal serine protease inhibitor PbraEPI2 (PITG_16472) mRNA, complete cds
jgi|Phyca11|504039|fgenesh2_kg.PHYCAscaffold_5_#_203_#_Contig3637.1	105	92	38	--	--	--	--	--	Putative uncharacterized protein GN=PHYSODRAFT_286743 OS=Phytophthora sojae (strain P6497) PE=4 SV=1	gi|301099965|ref|XP_002899073.1| protease inhibitor EpiC3 [Phytophthora infestans T30-4]	--
jgi|Phyca11|556046|estExt2_Genewise1Plus.C_PHYCAscaffold_820022	4	22	2	--	--	--	--	sp|P25304|AGRIN_RAT Agrin OS=Rattus norvegicus GN=Agrn PE=1 SV=2	Kazal-like serine protease inhibitor domain-containing protein GN=PHYSODRAFT_555498 OS=Phytophthora sojae (strain P6497) PE=4 SV=1	gi|301111962|ref|XP_002905060.1| protease inhibitor Epi11 [Phytophthora infestans T30-4]	--
jgi|Phyca11|551809|estExt2_Genewise1Plus.C_PHYCAscaffold_430311	4	28	49	--	--	Biological Process: proteolysis (GO:0006508);; Molecular Function: peptidase activity (GO:0008233);;	--	sp|A2ASQ1|AGRIN_MOUSE Agrin OS=Mus musculus GN=Agrn PE=2 SV=1	Kazal-like serine protease inhibitor EPI10 OS=Phytophthora infestans (Potato late blight fungus) PE=2 SV=1	gi|46560138|gb|AAT00509.1| Kazal-like serine protease inhibitor EPI10 [Phytophthora infestans]	Phytophthora capsici clone CBOU33-P03 mRNA sequence
jgi|Phyca11|130824|e_gw1.98.123.1	4	30	47	--	--	--	--	sp|O00468|AGRIN_HUMAN Agrin OS=Homo sapiens GN=AGRN PE=1 SV=4	Kazal-like serine protease inhibitor domain-containing protein GN=PHYSODRAFT_527611 OS=Phytophthora sojae (strain P6497) PE=4 SV=1	gi|27922927|gb|AAO24652.1| unknown protein [Phytophthora sojae]	--
jgi|Phyca11|571778|estExt2_Genewise1.C_PHYCAscaffold_430320	7	43	74	--	--	--	--	sp|P25304|AGRIN_RAT Agrin OS=Rattus norvegicus GN=Agrn PE=1 SV=2	Kazal-like serine protease inhibitor domain-containing protein GN=PHYSODRAFT_555498 OS=Phytophthora sojae (strain P6497) PE=4 SV=1	gi|301111962|ref|XP_002905060.1| protease inhibitor Epi11 [Phytophthora infestans T30-4]	--

## Sheet: CBEL
Gene ID	MY	ZO	GC	COG_class	COG_class_annotation	GO_annotation	KEGG_annotation	Swissprot_annotation	TrEMBL_annotation	NR_annotation	NT_annotation
jgi|Phyca11|505513|fgenesh2_kg.PHYCAscaffold_13_#_163_#_4097101:1	20	77	17	--	--	Cellular Component: extracellular region (GO:0005576);; Biological Process: proteolysis (GO:0006508);; Biological Process: blood coagulation (GO:0007596);; Molecular Function: carbohydrate binding (GO:0030246);;	--	--	Cellulose binding elicitor lectin, putative GN=PITG_17040 OS=Phytophthora infestans (strain T30-4) PE=4 SV=1	gi|301096293|ref|XP_002897244.1| cellulose binding elicitor lectin, putative [Phytophthora infestans T30-4]	Phytophthora infestans T30-4 cellulose binding elicitor lectin, putative (PITG_17040) mRNA, complete cds
jgi|Phyca11|559956|estExt2_Genewise1.C_PHYCAscaffold_40324	0	3	41	--	--	Molecular Function: carbohydrate binding (GO:0030246);;	--	--	CBEL-like protein OS=Phytophthora infestans (Potato late blight fungus) PE=2 SV=1	gi|301117938|ref|XP_002906697.1| cellulose binding elicitor lectin (CBEL), putative [Phytophthora infestans T30-4]	Phytophthora infestans T30-4 cellulose binding elicitor lectin (CBEL), putative (PITG_03640) mRNA, complete cds
jgi|Phyca11|503611|fgenesh2_kg.PHYCAscaffold_4_#_150_#_4099258:2	23	45	92	--	--	Molecular Function: hydrolase activity, hydrolyzing O-glycosyl compounds (GO:0004553);; Cellular Component: extracellular region (GO:0005576);; Biological Process: carbohydrate metabolic process (GO:0005975);; Biological Process: proteolysis (GO:0006508);; Biological Process: blood coagulation (GO:0007596);; Molecular Function: cellulose binding (GO:0030248);;	--	sp|A8MUU9|YV023_HUMAN Putative uncharacterized protein ENSP00000383309 OS=Homo sapiens PE=5 SV=3	CBEL protein, formerly GP34 (Precursor) GN=cbel1 OS=Phytophthora parasitica (Potato buckeye rot agent) PE=2 SV=1	gi|2706495|emb|CAA65843.1| CBEL protein, formerly GP34 [Phytophthora parasitica]	Phytophthora infestans T30-4 cellulose binding elicitor lectin (CBEL), putative (PITG_03639) mRNA, complete cds
jgi|Phyca11|12161|fgenesh1_pm.PHYCAscaffold_99_#_1	2	26	45	--	--	--	--	--	Cellulose binding elicitor lectin (CBEL), putative GN=PITG_10284 OS=Phytophthora infestans (strain T30-4) PE=4 SV=1	gi|301106046|ref|XP_002902106.1| cellulose binding elicitor lectin (CBEL), putative [Phytophthora infestans T30-4]	Phytophthora infestans T30-4 cellulose binding elicitor lectin (CBEL), putative (PITG_10284) mRNA, complete cds

## Sheet: notes
1)	Gene IDs consist of 4 strings of characters ,i.e. 'jgi','Phyca11',Protein ID (number) and Gene model name in JGI P. capsici genome database (immediately after Protein ID).
	Four strings of character are separated by three vertical bars.
2)	The P. capsici DEGs were compared against the NCBI Nt database (BLASTn), NCBI Nr, Swiss-Prot, TrEMBL, GO, COG, KEGG databases (BLASTx) with an E-value of 1e-5.
3)	The columns with different sample names show the normalized RPKM integer values for each gene in each sample.
